# Supplementary material for: Structural basis for high-affinity binding of LEDGF PWWP to mononucleosomes
Source: PubMed Central journal article supplement — Nucleic Acids Res. 2013 Feb 8;41(6):3924–36. doi: 10.1093/nar/gkt074 (PMC3616739; doi:10.1093/nar/gkt074), 2013-02-08
Supplement: supp_gkt074_nar-02751-f-2012-File008.pdf [file supp_gkt074_nar-02751-f-2012-File008.pdf]

## Structural basis for high affinity binding of LEDGF PWWP to mononucleosomes

Jocelyn O. Eidahl, Brandon L. Crowe, Justin A. North, Christopher J. McKee, Nikoloz Shkriabai, Lei Feng, Matthew Plumb, Robert L. Graham, Robert J. Gorelick, Sonja Hess, Micheal G. Poirier, Mark P. Foster, Mamuka Kvaratskhelia

### Supplemental Information

**Table S1.** LEDGF PWWP binds nucleosomes directly. The “Unweighted Spectrum Count” values for identified peptides are listed. Proteins were identified by MASCOT search engine and further organized using Scaffold3 software. Scaffold3 viewer settings were as follows: minimum identification probabilities for both protein and peptide were set at 95% resulting in a false discovery rate of less than 1%.

| Identified Proteins                              | Load control | Pull-down |
|--------------------------------------------------|--------------|-----------|
| LEDGF/p75                                        | 96           | 130       |
| Histone H4                                       | 103          | 116       |
| Histone H2A                                      | 77           | 109       |
| Histone H2B                                      | 45           | 33        |
| Histone H3                                       | 21           | 18        |
| Histone H1                                       | 10           | 17        |
| X-ray repair cross-complementing protein 6       | 6            | 0         |
| Ubiquinone biosynthesis monooxygenase COQ6       | 2            | 2         |
| X-ray repair cross-complementing protein 5       | 4            | 0         |
| DNA topoisomerase 2                              | 11           | 0         |
| FACT complex subunit SSRP1                       | 3            | 0         |
| FACT complex subunit SPT16                       | 7            | 0         |
| Topoisomerase (DNA) I                            | 3            | 1         |
| Serine/Arginine-rich splicing factor             | 4            | 0         |
| Heterochromatin protein 1- $\beta$               | 9            | 0         |
| DNA-dependent protein kinase catalytic subunit   | 6            | 0         |
| Dermcidin isoform 2                              | 1            | 0         |
| NOP56 protein                                    | 4            | 0         |
| H/ACA ribonucleoprotein complex subunit 1        | 1            | 0         |
| RNA binding motif protein, X-linked, isoform CRA | 2            | 0         |
| SNRNP200 protein                                 | 3            | 0         |

**Table S2.** NMR data

|                                                   |                 |             |
|---------------------------------------------------|-----------------|-------------|
| <b>NMR Constraints</b>                            |                 |             |
| <i>NOE-Based Distance Constraints:</i>            |                 |             |
| Total                                             |                 | <b>1429</b> |
| Intra-residue                                     | [ $i=j$ ]       | <b>302</b>  |
| Sequential                                        | [ $ i-j =1$ ]   | <b>421</b>  |
| Medium range                                      | [ $1< i-j <5$ ] | <b>245</b>  |
| Long range                                        | [ $ i-j >5$ ]   | <b>471</b>  |
| <i>Dihedral angle constraints:</i>                |                 | <b>127</b>  |
| <b>Total structures calculated</b>                |                 | <b>150</b>  |
| <b>Number of structures used</b>                  |                 | <b>20</b>   |
| <b>Residual constraint violations</b>             |                 |             |
| <i>Distance violations / structure</i>            |                 |             |
| 0.1-0.2 Å                                         |                 | <b>2.15</b> |
| 0.2-0.5 Å                                         |                 | <b>0.15</b> |
| > 0.5 Å                                           |                 | <b>0</b>    |
| <i>Dihedral angle violations / structure</i>      |                 |             |
| 1-10 °                                            |                 | <b>9.90</b> |
| > 10 °                                            |                 | <b>0.35</b> |
| <b>Ramachdran plot statistics (%)<sup>a</sup></b> |                 |             |
| Most favoured regions                             |                 | <b>79.3</b> |
| Additionally allowed regions                      |                 | <b>20.7</b> |
| Generously allowed regions                        |                 | <b>0.01</b> |
| Disallowed regions                                |                 | <b>0.0</b>  |
| <b>Precision (RMSD values) (Å)<sup>b</sup></b>    |                 |             |
| All backbone atoms                                |                 | <b>0.4</b>  |
| All heavy atoms                                   |                 | <b>0.9</b>  |

<sup>a</sup> Calculated via Procheck.

<sup>b</sup> Ordered residues used ranges from 2-36 and 39-91, selected based on: Dihedral angle order parameter, with  $S(\phi)+S(\psi)\geq 1.8$ .

## Supplemental Figures:

**Figure S1:** SDS-Page analysis of GST-tagged p75, IBD and PWWP used for pulldown experiments (1/4 input). Lane contents are as follows: lane 1 contains molecular weight marker, lanes 2-4 contain GST-tagged LEDGF/p75, PWWP and IBD, respectively.

**Figure S2:** The solution structure differs from coordinates deposited by Structural Genomics Consortium. A) Overlay of the NMR solution structure (Green, PDB ID: 2M16) and the crystal structure (Blue, PDB ID: 4FU6). B) Strips from the  $^{15}\text{N}$ -edited NOESY spectrum corresponding to the  $\text{H}^{\text{N}}$  from residues 76-84. Grey lines indicate the position of the diagonal signal; blue lines indicate the chemical shift the  $\text{H}^{\alpha}$  of the (i-3) residue. C) Close-up view of the crystal structure at the beginning of  $\alpha 3$  with the sidechains of Pro71 and Phe77 shown. D) The NMR structure in the same view. E) Strips from the  $^{13}\text{C}$ -edited aromatic region NOESY spectrum corresponding to the aromatic protons of Phe77. Position of signals corresponding to same residue are indicated by grey lines. The absence of NOEs to other protons argue strongly that the sidechain of Phe77 is not buried in the interior of the protein, as observed in the crystal, but rather points towards solvent. F) The crystal structure zoomed in to  $\alpha 2$  with the sidechains of His20, Phe59, Pro60, Asn64, Lys67, and Tyr68 shown. G) The NMR structure in the same view as G. H) Strips from the  $^{13}\text{C}$ -edited aromatic region NOESY spectrum corresponding to the aromatic protons of Tyr68. Grey lines indicate chemical shifts for protons of the same residue. Positions of expected NOE crosspeaks to Tyr68 in both the NMR and crystal structure are indicated by cyan lines, while expected NOEs to His20 protons from the crystal structure are indicated by red lines. The absence of these NOEs indicates the stacking between His and Tyr rings observed in the crystal is not observed in solution.

**Figure S3:** Comparison and analysis of the present work with deposited coordinates. A) Solution and crystal structures of LEDGF PWWP domain differ. (Top) Blue, crystal structure 4FU6; green, NMR ensemble. Despite a high degree of structural similarity, significant differences are observed in the loop between helices  $\alpha 2$  and  $\alpha 3$  that repackage the aromatic residues Tyr68 and Phe77. B) Superposition of the NMR solution (blue) and crystal (4FU6, pink and cyan) structures. Overall, the structures are highly similar (1.0 Å RMSD for  $\text{C}^{\alpha}$  excluding the region spanning residues 68-86). In this region, there are significant differences in the backbone structure that accompany differences in packing of the hydrophobic core. C)  $F_0 - F_c$  map contoured at 3  $\sigma$ . Mesh illustrates unexplained density in the interface between two molecules in the asymmetric unit, and in the vicinity of structural differences between the solution and crystal structures.

**Figure S4:** The HSQC spectra for the titrations of H3K36me3 (A), the unmodified H3 peptide (B) and DNA (C). Free LEDGF PWWP is in black. LEDGF PWWP with 80:1 equivalence of H3K36me3 is in red (A); LEDGF PWWP with 80:1 equivalence of the unmodified H3 peptide is in blue (B); LEDGF PWWP with 3.2:1 equivalence of DNA is in green (C).

**Figure S5:** The CSP values for the titrations of H3K36me3, unmodified H3 peptide, and DNA. The H3K36me3 titration CSP are red (top). The unmodified H3 peptide titration CSP are blue (Middle). The DNA titration CSP are green (bottom). All CSP values are determined by the equation  $\Delta\delta(\text{ppm}) = \sqrt{0.5(\Delta\delta_{\text{H}}^2 + (\Delta\delta_{\text{N}}^2/25))}$ . The secondary structure is show above the graph. The gradients on the right side of the graph show the coloring used in Figure 4 C and D to map the CSP data.

**Figure S6:** The quantitative analysis of the NMR titration experiments. A and B show CSP values for W21 and A51 with addition of increasing concentrations of the H3K36me3 peptide (red squares) and its unmodified counterpart (blue circles) to LEDGF PWWP. C and D show CSP values for K75 and F77 upon titration of DNA (green squares) into LEDGF PWWP.

**Figure S7:** EMSA analysis of the LEDGF PWWP interactions with DNA. Increasing concentrations of GST-LEDGF PWWP were incubated with 300 nM of native DNA (A), SMYD1 DNA (B) or non-specific DNA (C), and the complexes were analyzed by EMSA. Lane 1 in A and C contain DNA marker ranging from 250bp to 12,000bp (Bioline Quanti-Marker 1kb). To quantitatively analyze the data, the disappearance of free DNA was monitored. Each experiment was repeated at least twice and yielded highly reproducible results. Plots in (D), (E), and (F) quantitatively represent DNA binding in (A), (B), and (C), respectively.

**Figure S8:** A molecular model of the LEDGF PWWP:MN complex. Front (A) and side (B) views are shown. The histone core is in black, the wrapped DNA is in magenta, the electrostatic potential of LEDGF PWWP surface is shown. A zoomed view for the LEDGF PWWP binding to MN is depicted in Figure 6.

**Figure S9:** A) Sequence alignment of various PWWP domains. Block letters indicate invariant residues and boxes indicate residues with a global similarity scores >0.7. Alignment was performed using ClustalW (50) and colored according to similarity with a Risler scoring matrix (51) using the program ESPript (52). B) Side by side comparison of the PWWP domain from various proteins: (13,14,18,19). All PWWPs are shown in the same orientation to the  $\beta$ -barrel core. All PWWP domains are labeled by protein containing the PWWP domain and with the PDB ID. The structural elements that contribute to the hydrophobic cavity are shown in green. The aromatic conserved side chain located in the hydrophobic pocket of each domain is shown in blue. The C-terminal segments contributing to the top wall of the hydrophobic cavity are shown in red.

**Figure S10:** Side by side comparison of LEDGF PWWP domain (PDB ID: 2M16) and the Brpf1 PWWP domain with the H3K36Me3 peptide (PDB ID: 2X4W) (14). The sidechain of the conserved aromatic residue (Trp21 in LEDGF, Tyr1099 in Brpf1) located in the hydrophobic pocket in both proteins are shown in blue. The Brpf1 segments interacting with the cognate peptide, which include  $\alpha$ -helix (1125-1139), two short  $\beta$  barrels (1113-1115 and 1118-1120), and their connecting loop (1121-1124) are colored red. In contrast, the corresponding region of LEDGF PWWP that interacts with the H3K36Me3 peptide contains a loop connecting  $\beta$ 2 and  $\beta$ 3 (colored red).

#### References:

13. Qiu, Y., Zhang, W., Zhao, C., Wang, Y., Wang, W., Zhang, J., Zhang, Z., Li, G., Shi, Y., Tu, X. *et al.* (2012) Solution structure of the Pdp1 PWWP domain reveals its unique binding sites for methylated H4K20 and DNA. *Biochem J*, **442**, 527-538.
14. Vezzoli, A., Bonadies, N., Allen, M.D., Freund, S.M., Santiveri, C.M., Kvinlaug, B.T., Huntly, B.J., Gottgens, B. and Bycroft, M. (2010) Molecular basis of histone H3K36me3 recognition by the PWWP domain of Brpf1. *Nat Struct Mol Biol*, **17**, 617-619.
18. Wu, H., Zeng, H., Lam, R., Tempel, W., Amaya, M.F., Xu, C., Dombrovski, L., Qiu, W., Wang, Y. and Min, J. (2011) Structural and histone binding ability characterizations of human PWWP domains. *PLoS one*, **6**, e18919.
19. Lukasik, S.M., Cierpicki, T., Borloz, M., Grembecka, J., Everett, A. and Bushweller, J.H. (2006) High resolution structure of the HDGF PWWP domain: a potential DNA binding domain. *Protein Sci*, **15**, 314-323.

50. Thompson, J.D., Higgins, D.G. and Gibson, T.J. (1994) CLUSTAL W: improving the sensitivity of progressive multiple sequence alignment through sequence weighting, position-specific gap penalties and weight matrix choice. *Nucleic Acids Res*, **22**, 4673-4680.
51. Risler, J.L., Delorme, M.O., Delacroix, H. and Henaut, A. (1988) Amino acid substitutions in structurally related proteins. A pattern recognition approach. Determination of a new and efficient scoring matrix. *J Mol Biol*, **204**, 1019-1029.
52. Gouet, P., Courcelle, E., Stuart, D.I. and Metz, F. (1999) ESPript: analysis of multiple sequence alignments in PostScript. *Bioinformatics*, **15**, 305-308.

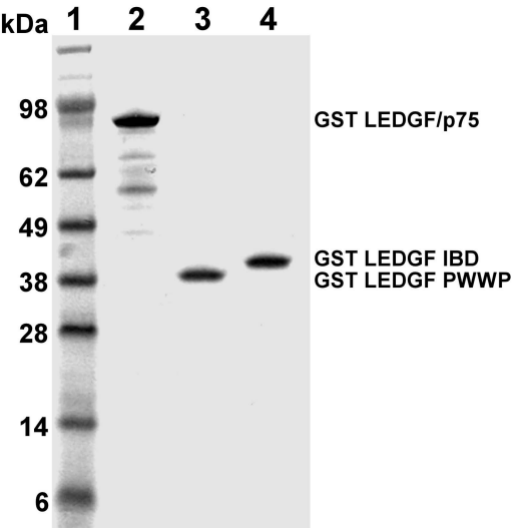

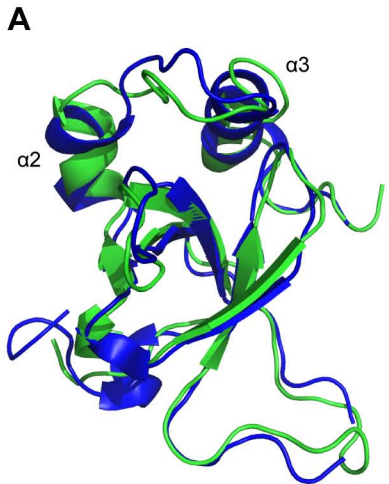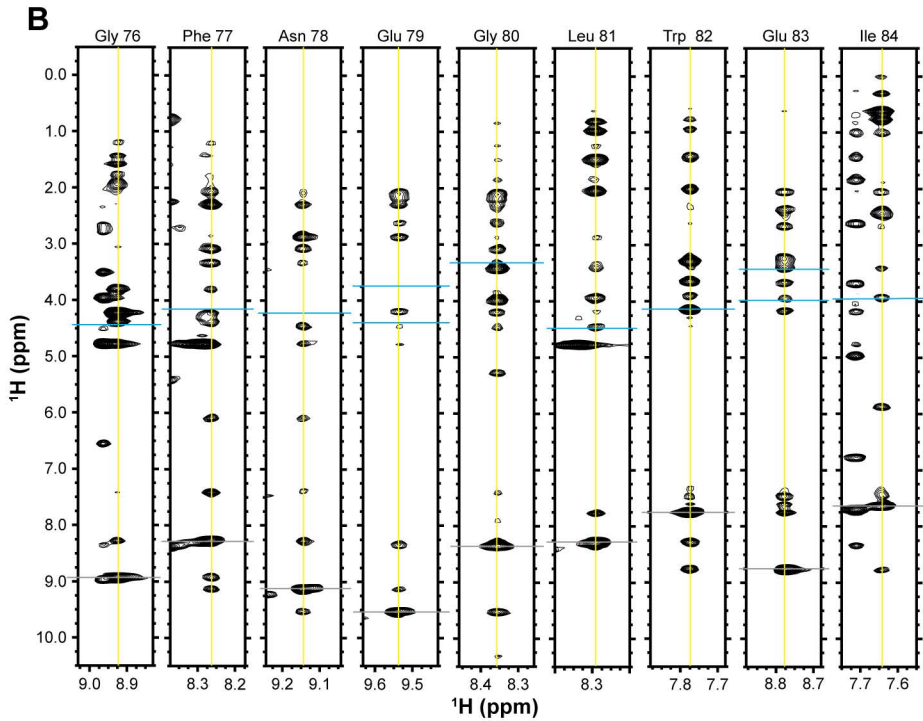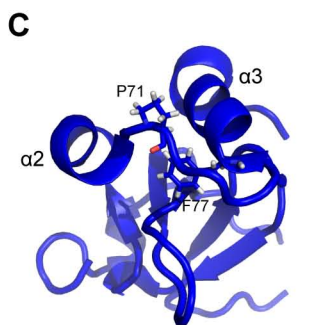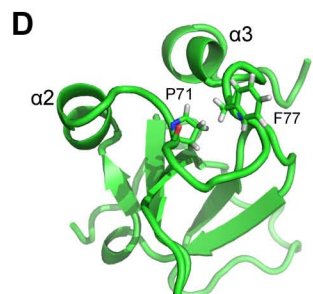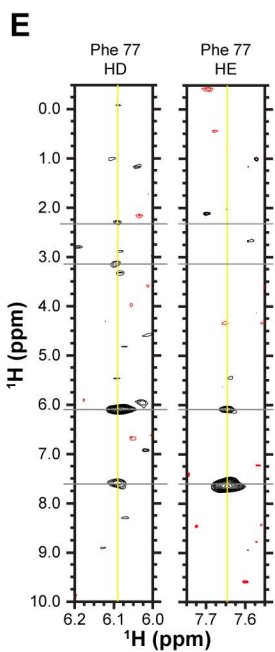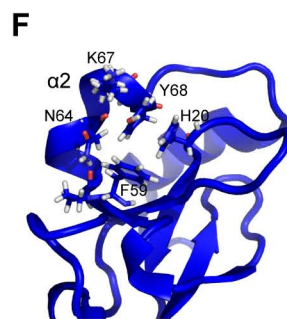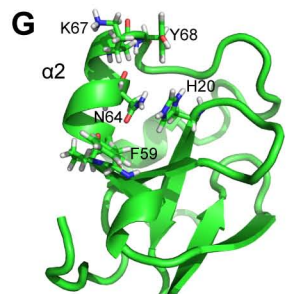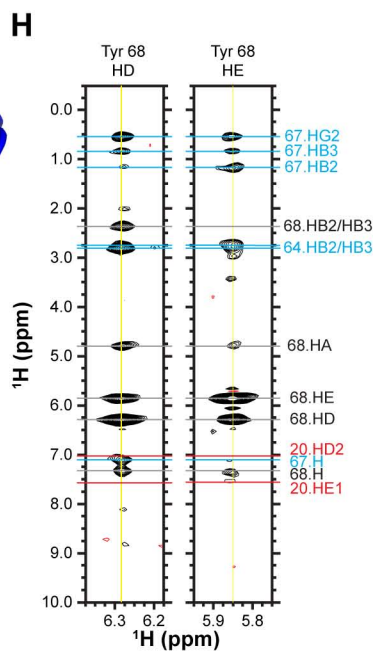

**A**

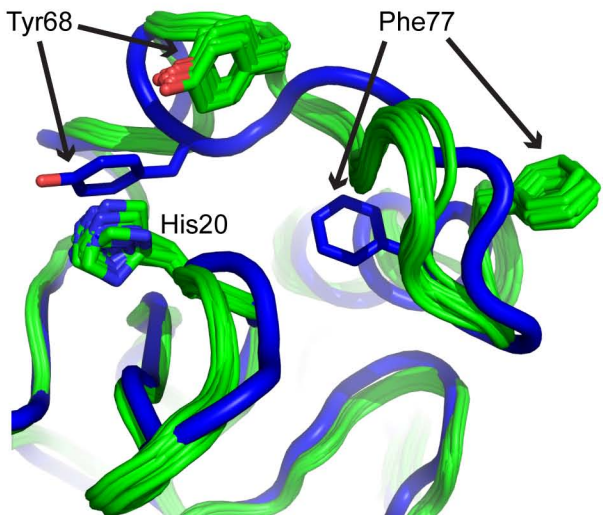

**B**

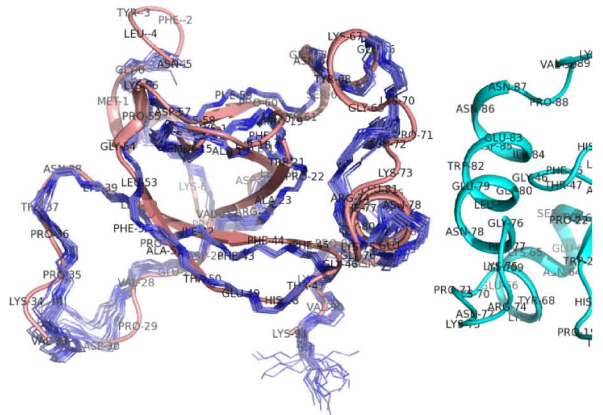

**C**

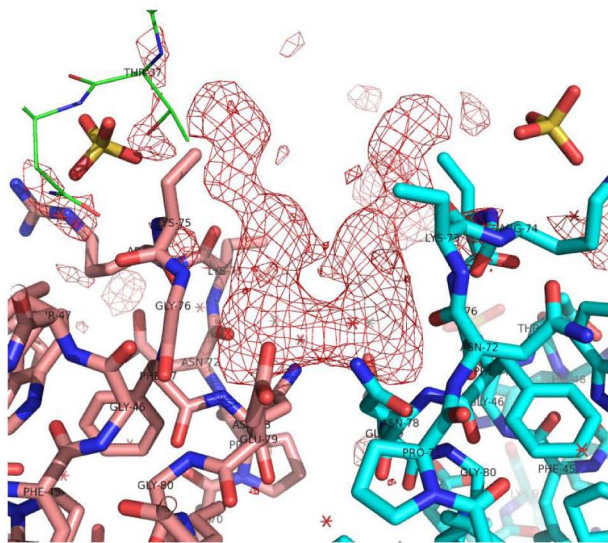



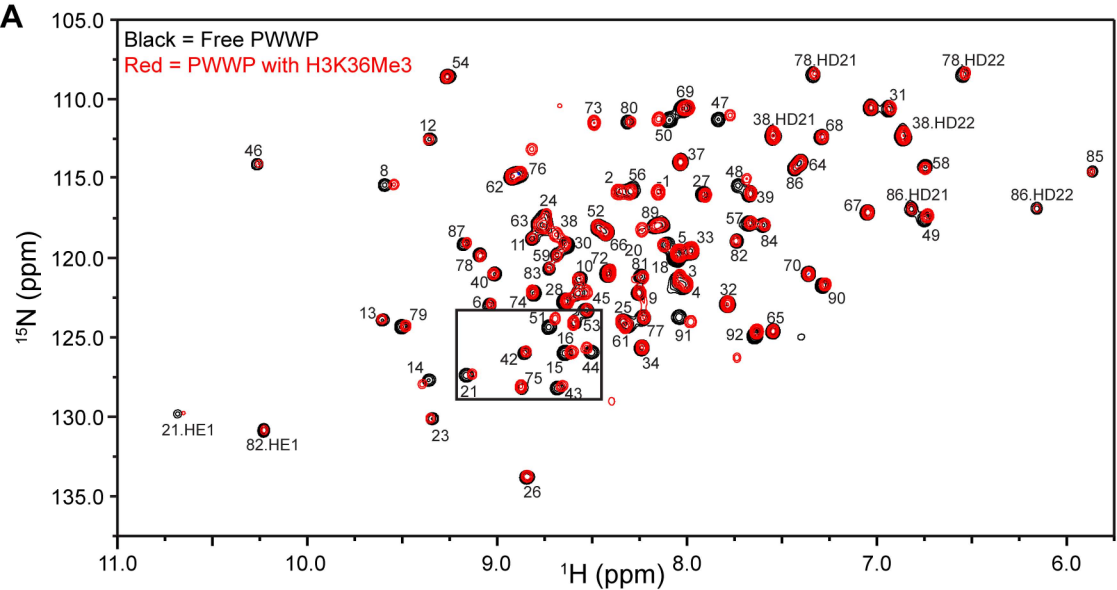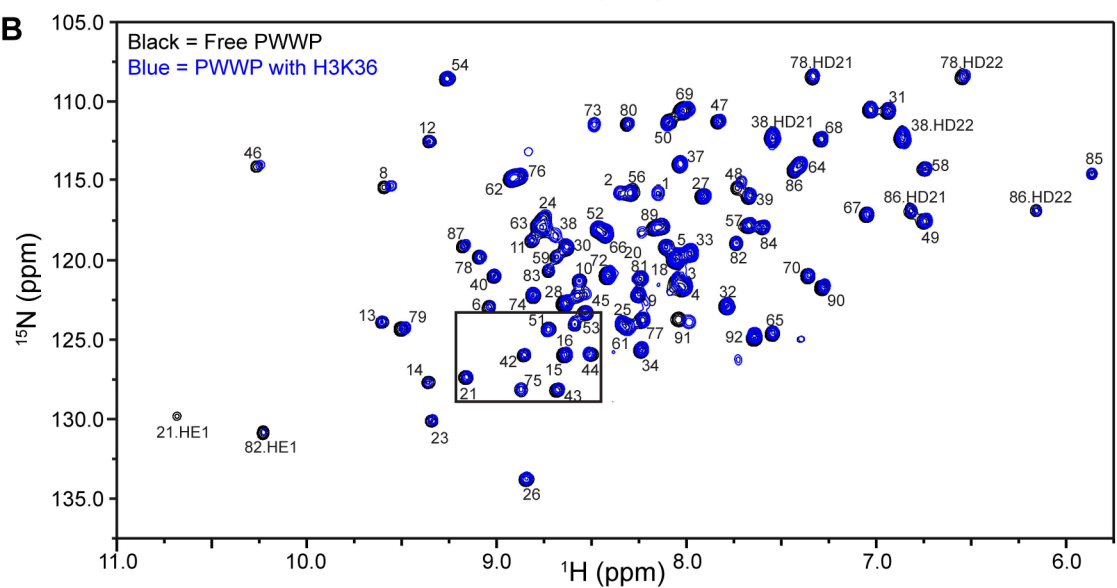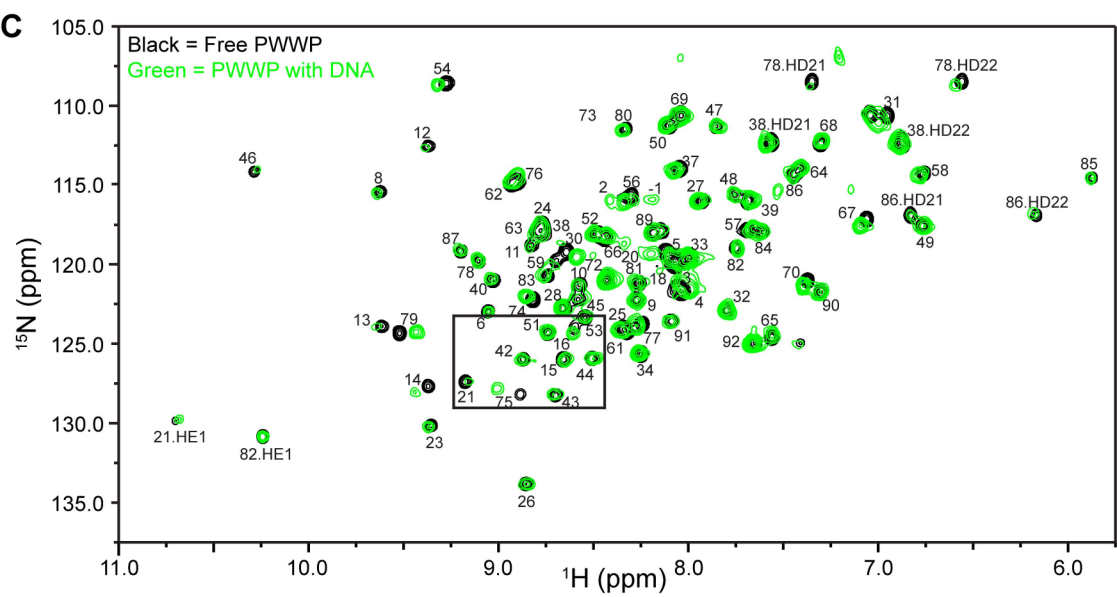

# Chemical Shift Perturbations

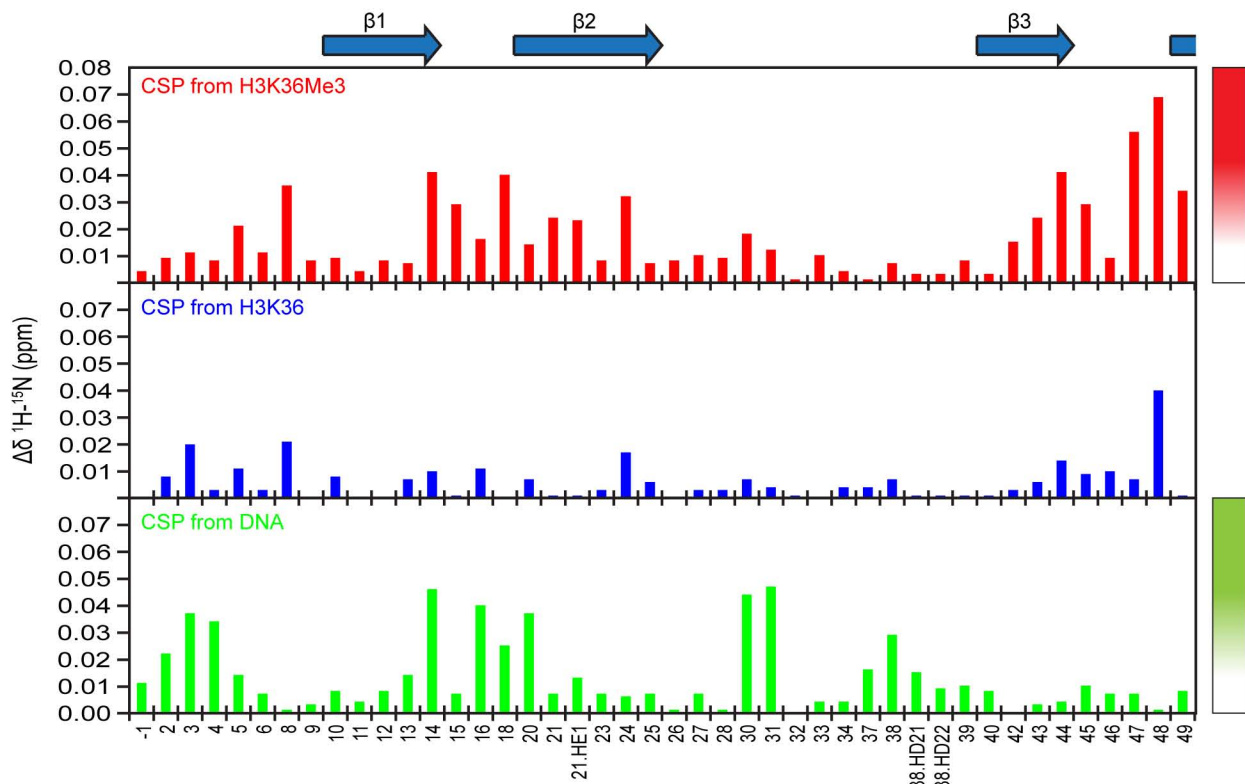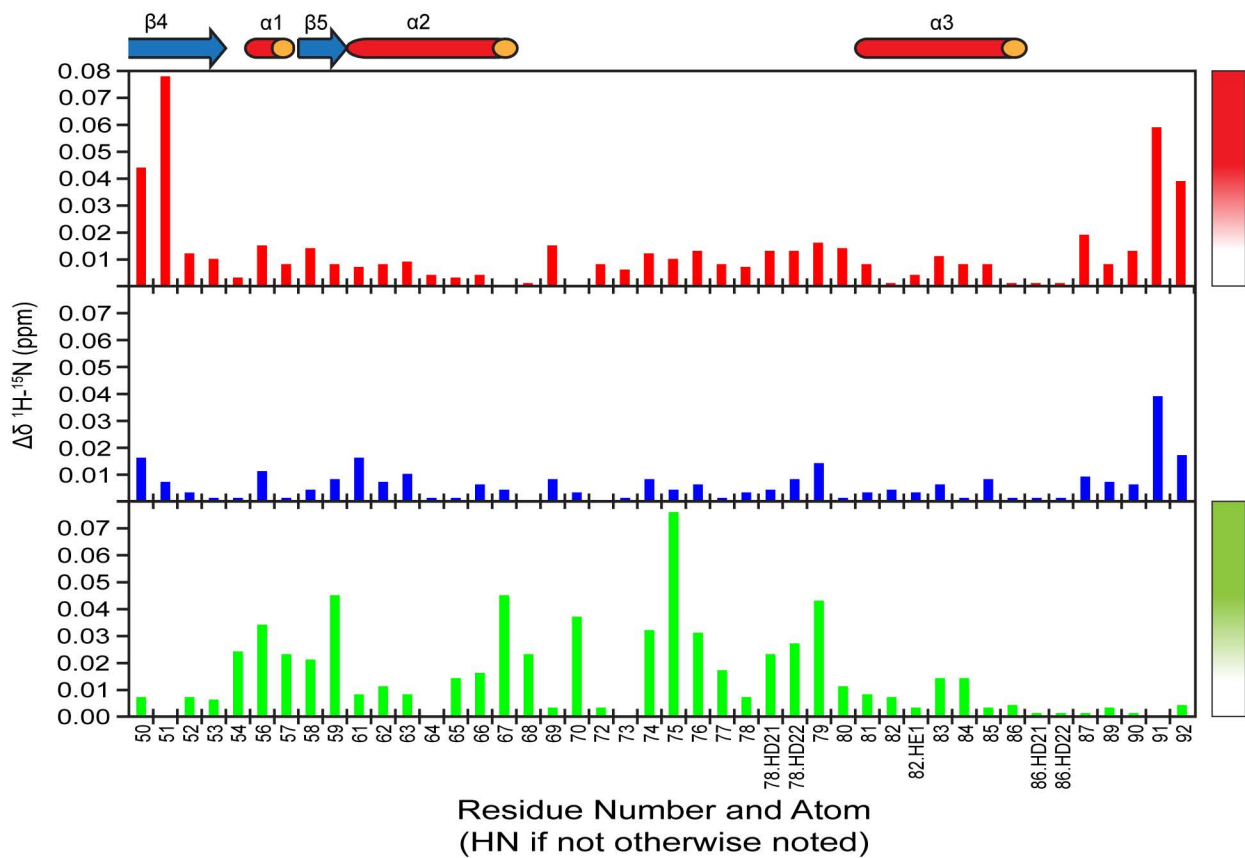

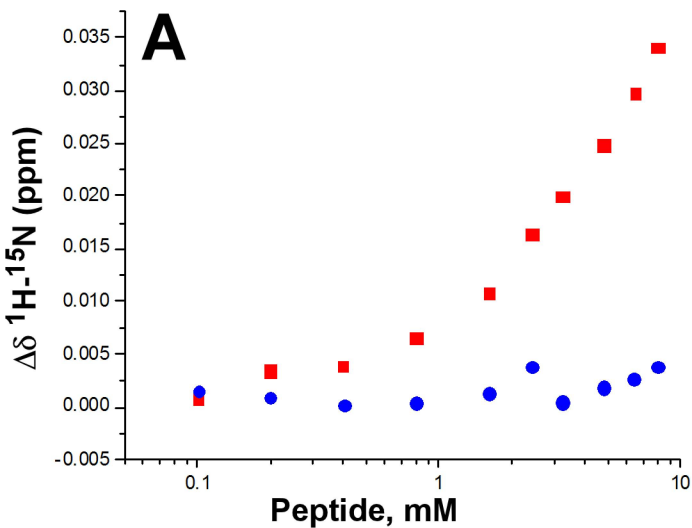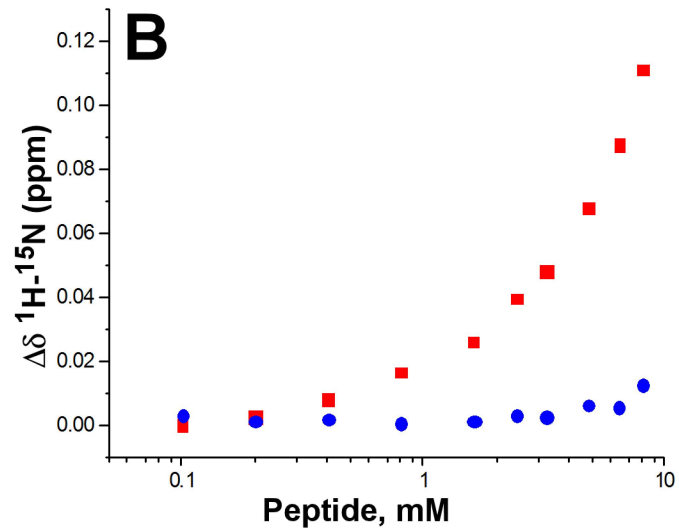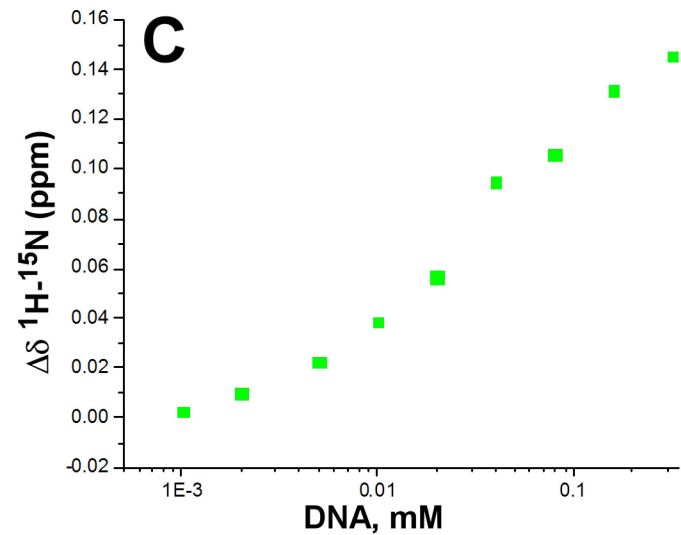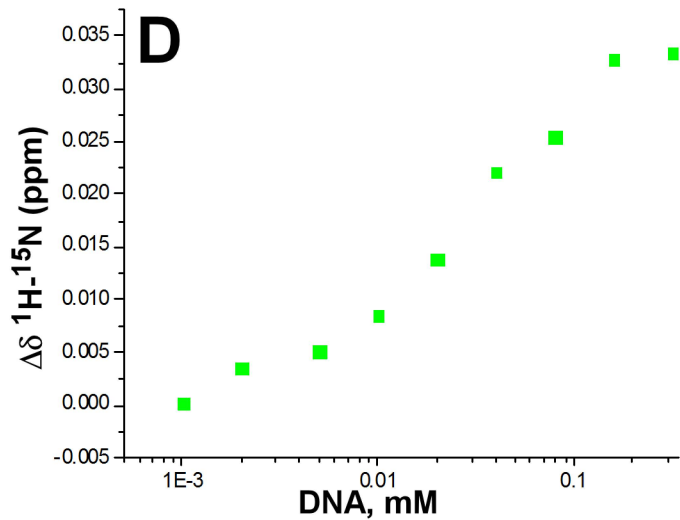

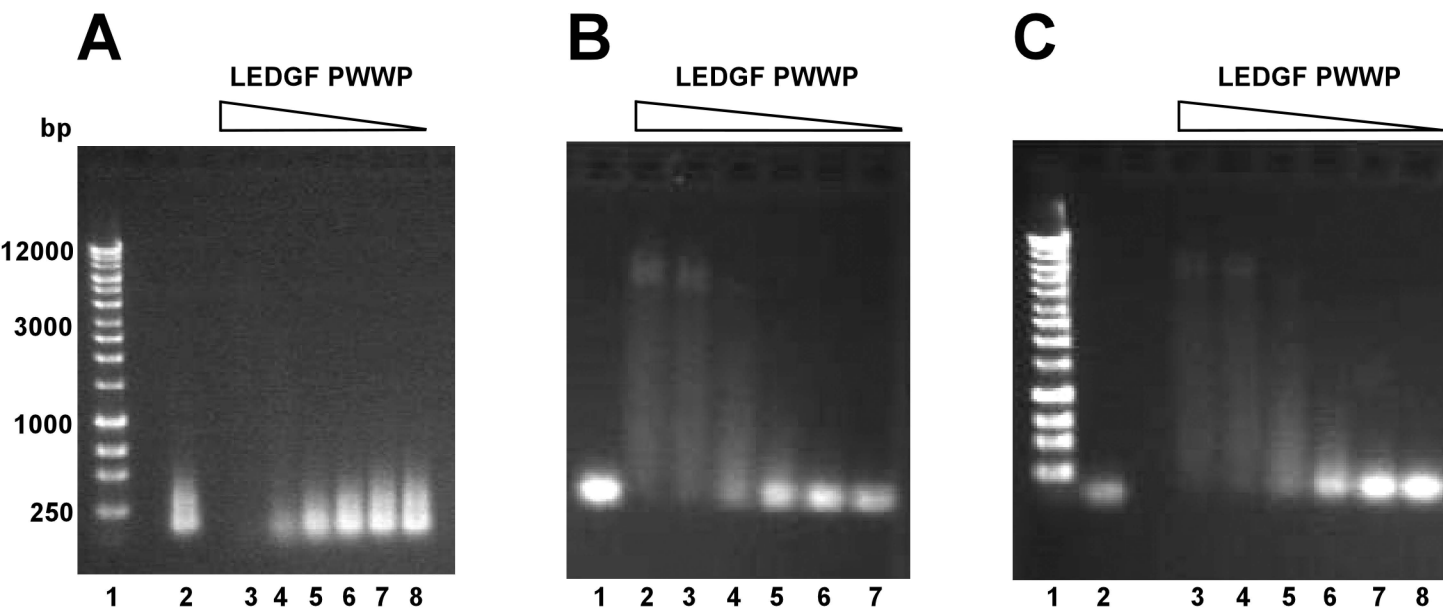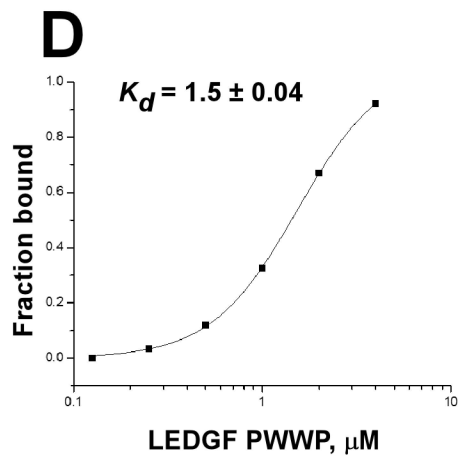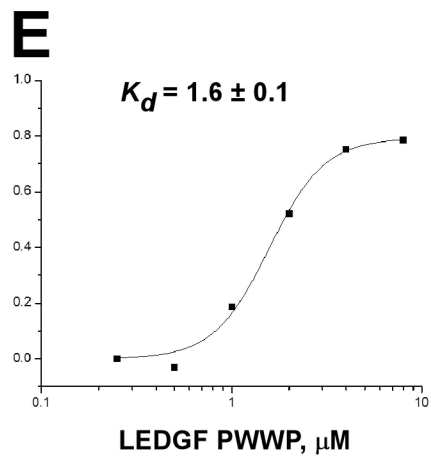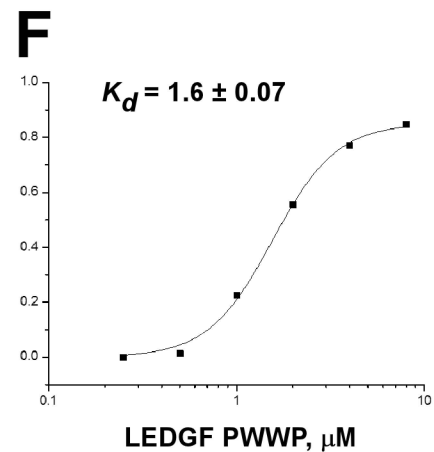

**A**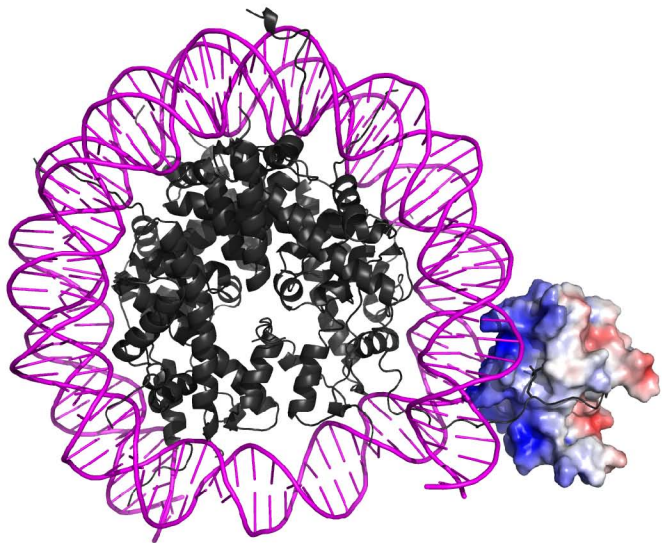**B**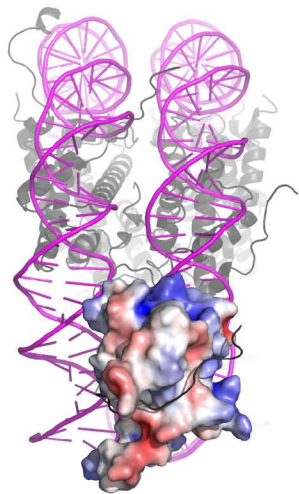

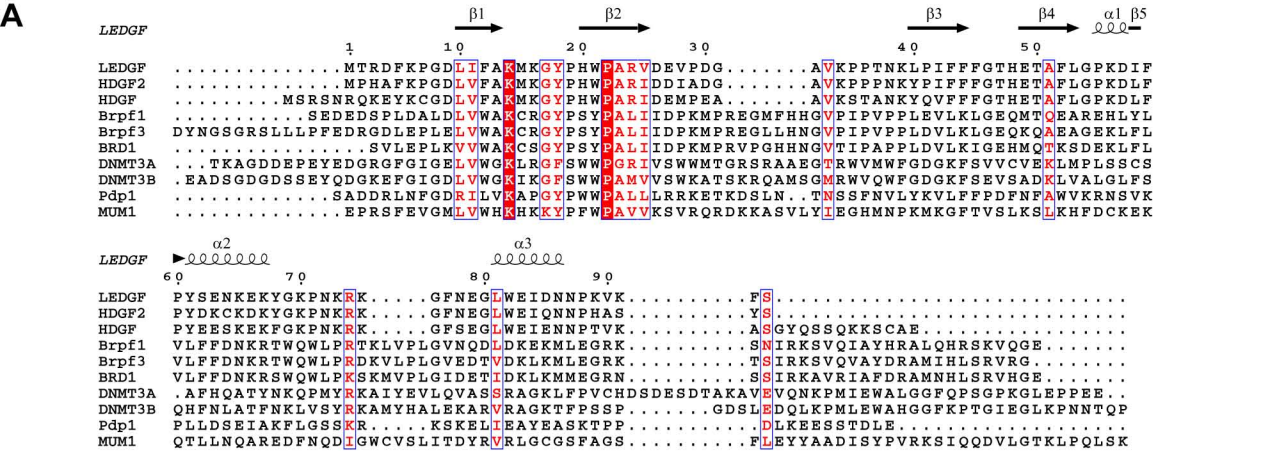

**B**

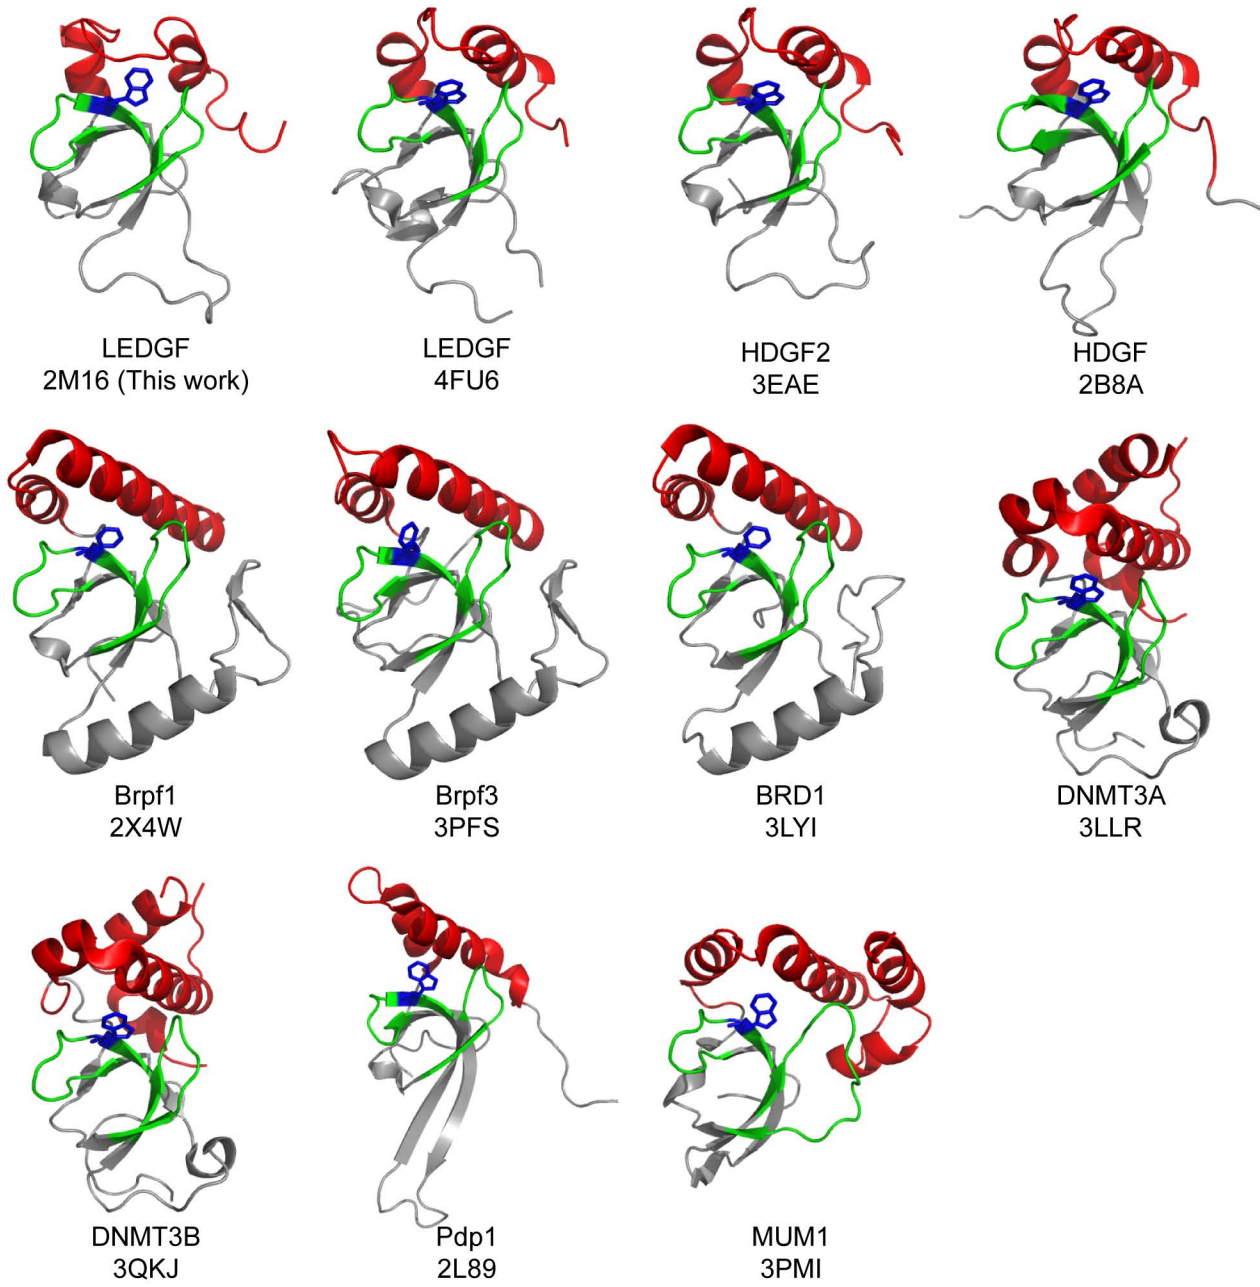



**A**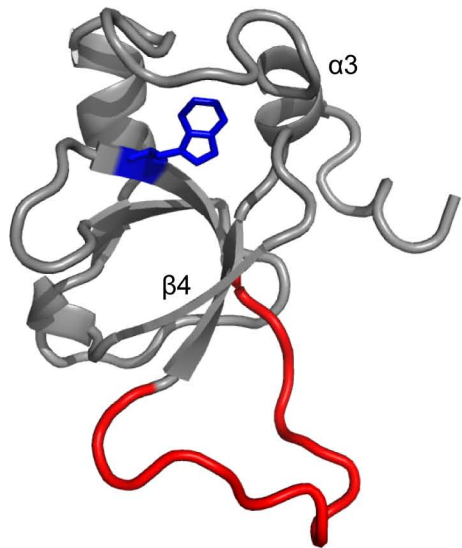**LEDGF PWWP****B**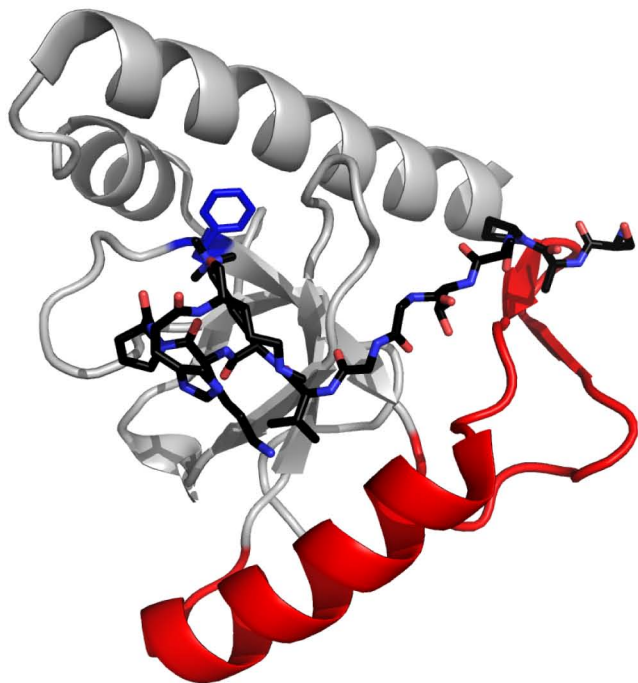**Brpf1 PWWP with H3K36me3**
